# Supplementary material for: The PPP2R1A cancer hotspot mutant p.R183W increases clofarabine resistance in uterine serous carcinoma cells by a gain-of-function mechanism
Source: Research Square preprint supplement (doi:10.21203/rs.3.rs-4211521/v1), 2024-04-12
Supplement: Supplementary file 1 [file b5c5001592622d30876f7605.pdf]

**A**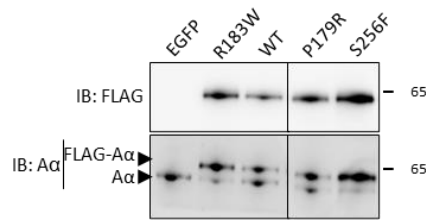**B**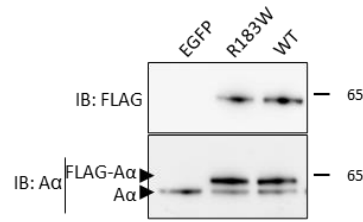

**Supplementary figure S1: Ectopic expression of FLAG-tagged EGFP, WT A $\alpha$  or mutant A $\alpha$  (p.P179R, p.R183W and p.S256F) in ARK-4 and ARK-1 cells. (A)** Representative immunoblots (IB) of ARK-4 cells expressing FLAG-tagged EGFP, WT A $\alpha$  or mutant A $\alpha$ . The upper band in the A $\alpha$  immunoblot represents the FLAG-tagged A $\alpha$  while the lower band represents the endogenous A $\alpha$ , as indicated with the arrowheads. **(B)** Representative immunoblots of ARK-1 cells expressing FLAG-tagged EGFP, WT A $\alpha$  or p.R183W A $\alpha$ . The upper band in the A $\alpha$  immunoblot represents the FLAG-tagged A $\alpha$  while the lower band represents the endogenous A $\alpha$ , as indicated with the arrowheads.

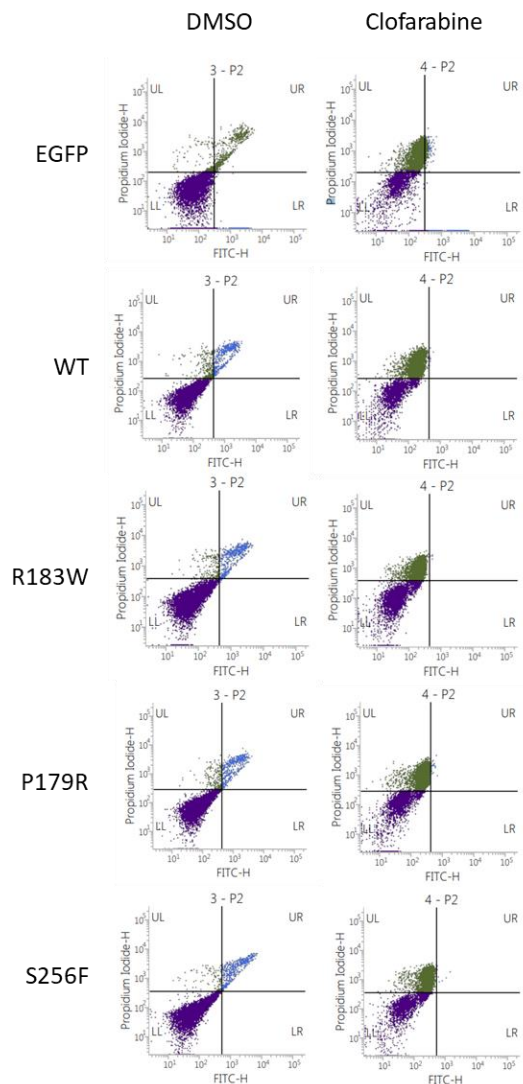

**Supplementary figure S2: p.R183W mutant A $\alpha$  expressing USC cells undergo less apoptotic cell death after clofarabine treatment.** Representative Annexin V (FITC conjugated)/Propidium Iodide (PI) flow cytometry plots for ARK-4 cells expressing EGFP, mutant A $\alpha$  (p.P179R, p.R183W and p.S256F) or WT A $\alpha$ , after treatment with 250nM clofarabine for 72 hours.

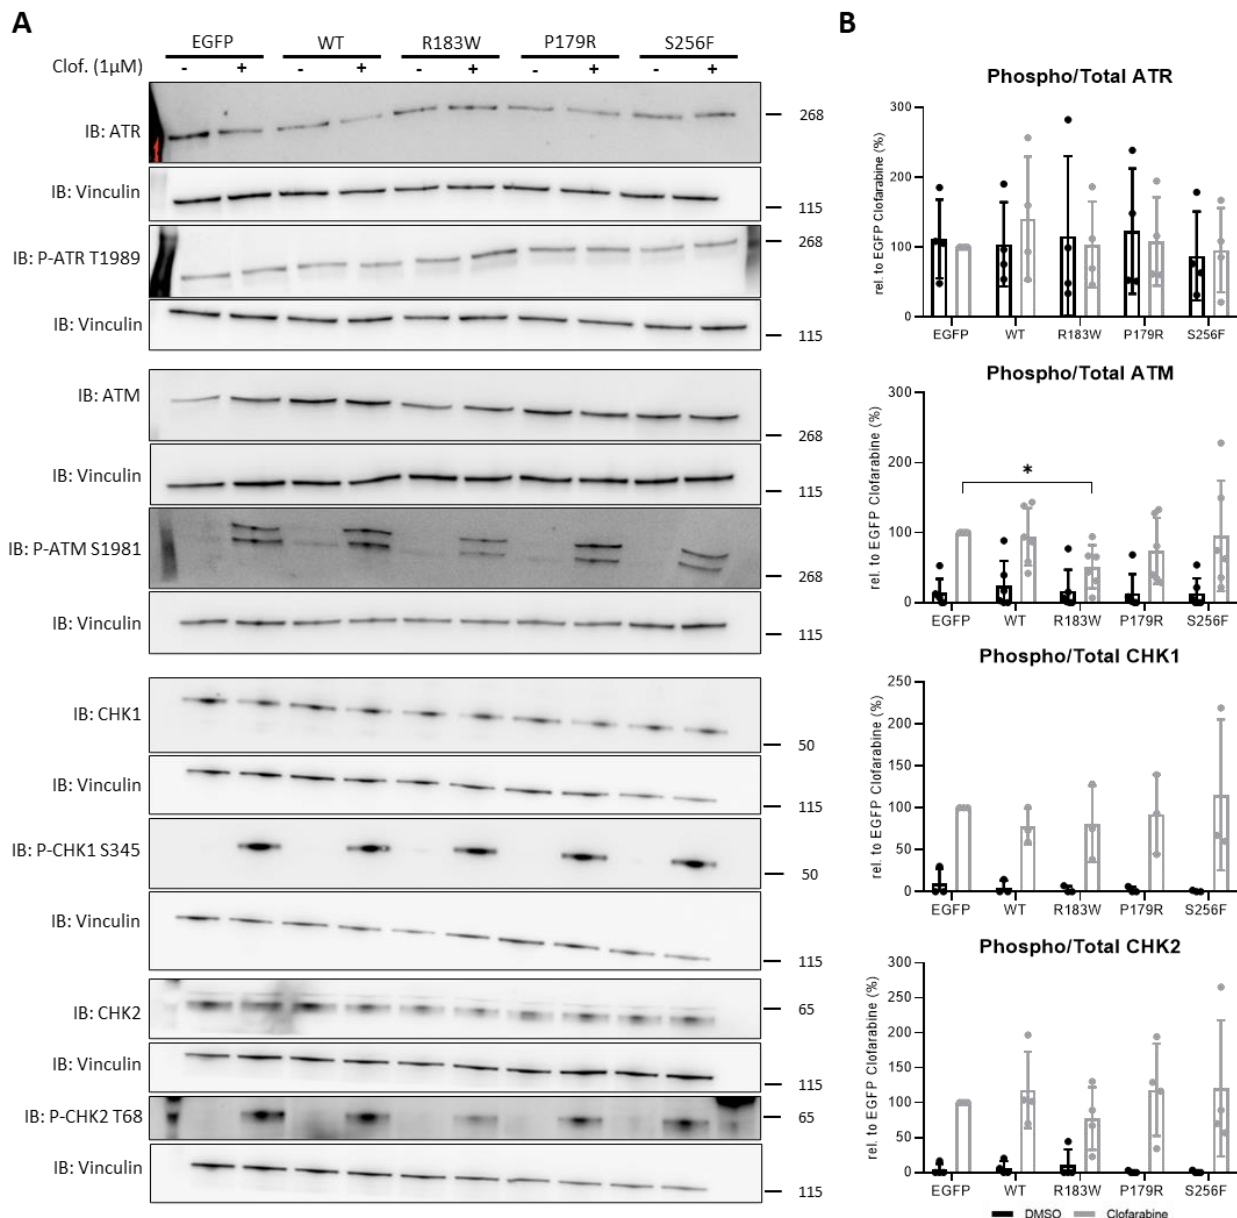

**Supplementary figure S3: p.R183W A $\alpha$  expressing USC cells show reduced ATM signaling activation after treatment with clofarabine for 3 hours. (A)** Representative immunoblots (IB) for checkpoint signaling kinases ATR/ATM and CHK1/2 after treatment with 1 $\mu$ M clofarabine or DMSO for 3 hours. Vinculin was used as loading control. **(B)** Quantification of immunoblots in (A) relative to clofarabine-treated EGFP cells. Data are represented as mean  $\pm$  SD,  $n \geq 3$ .  $P$  values were determined by One-Way ANOVA compared to clofarabine-treated EGFP cells with Dunnett's correction for multiple comparisons, \* $p < 0.05$ .

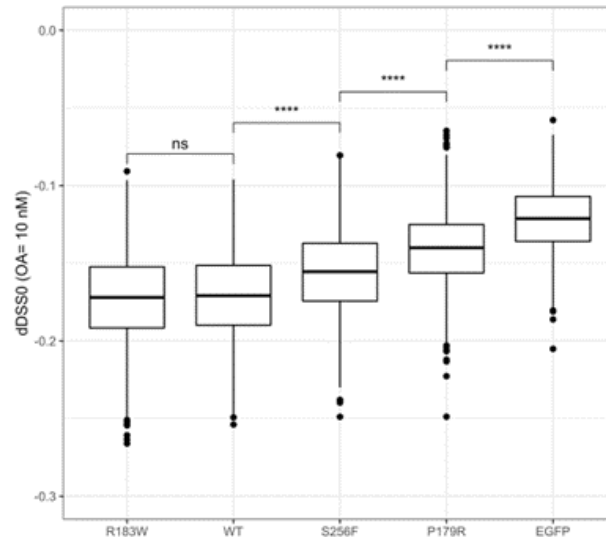

**Supplementary figure S4: p.R183W Aα expressing ARK-4 cells have the highest reduction in dDSS0 after combination treatment of clofarabine with okadaic acid (OA).** The differential drug sensitivity score (dDSS0) is calculated by subtracting the control DSS0 (OA = 0nM) from the DSS0 (OA = 10nM). DSS0 is calculated as AUC (Area under the curve)<sub>min~max compound concentration</sub> – BOTTOM<sub>(max compound concentration – 0)</sub>. The boxplots represent the interquartile range of dDSS0 from 1000 Monte Carlo simulations. The Wilcoxon test is used to examine the statistical difference in dDSS0 between cell lines. \*\*\*\* $p < 0.0001$ , ns=not significant.

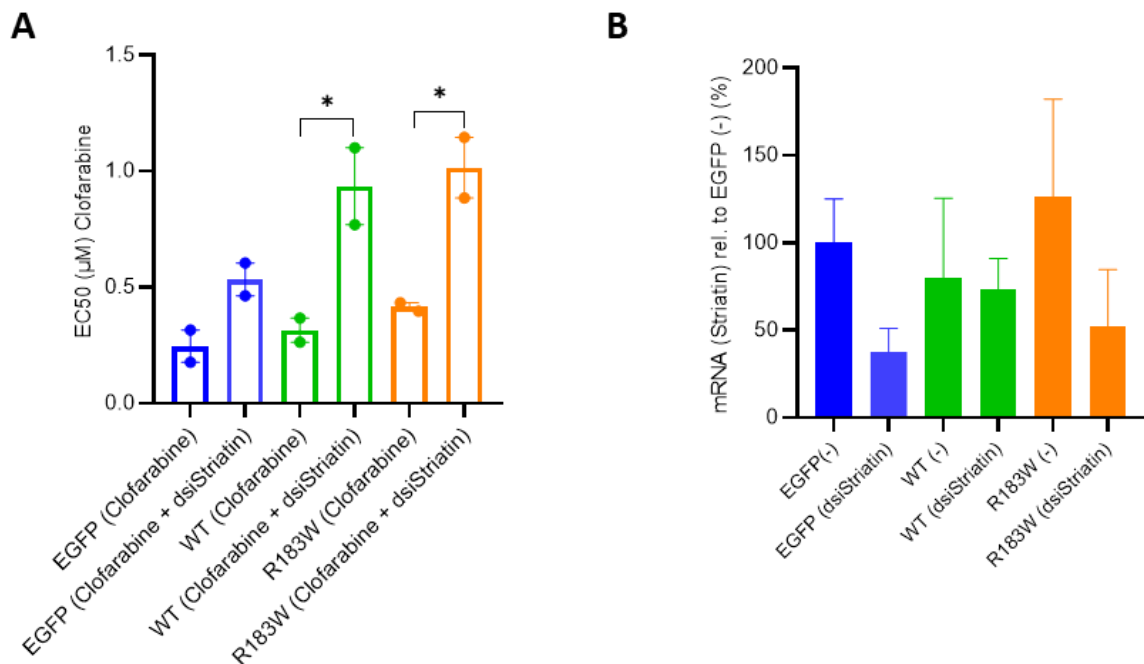

**Supplementary figure S5: Knockdown of Striatin increases resistance of the ARK-4 cells to clofarabine.** **(A)** EC<sub>50</sub> (μM) values from 72 hours clofarabine treatment with or without knockdown (KD) of Striatin via dicer-substrate small-interferingRNA (dsiRNA) as measured by MTT assay. Data are represented as mean ± SEM, n=2. **(B)** mRNA levels as measured by qRT-PCR, confirming knockdown of striatin in EGFP and p.R183W Aα expressing ARK-4 cells at time of MTT assay (A).

**Supplementary Table S1:** Antibody list

| Antibody                            | Company                            | Product number |
|-------------------------------------|------------------------------------|----------------|
| Cleaved PARP (Asp214) (D64E10) XP ® | Cell Signaling                     | 5625S          |
| Cleaved caspase-3 (Asp175)          | Cell Signaling                     | 9661S          |
| Total ATR                           | Cell Signaling                     | 2790S          |
| Phospho (T1989) ATR                 | Cell Signaling                     | 2853S          |
| Total ATM                           | Cell Signaling                     | 2873S          |
| Phospho (S1981) ATM                 | Cell Signaling                     | 13050S         |
| Total CHK1                          | Cell Signaling                     | 2360S          |
| Phospho (S345) CHK1                 | Cell Signaling                     | 2348S          |
| Total CHK2                          | Cell Signaling                     | 6334S          |
| Phospho (T68) CHK2                  | Cell Signaling                     | 2197S          |
| Total dCK                           | Cell Signaling                     | 10478S         |
| Phospho (Ser74) dCK                 | Cell Signaling                     | 40371S         |
| Vinculin                            | Sigma                              | V9131          |
| B56δ                                | Abcam                              | Ab188323       |
| Aα (C5.3D10)                        | Generous gift of Prof. S. Dilworth | /              |
| FLAG                                | Sigma                              | F1804          |
| Anti-mouse (secondary antibody)     | Dako                               | P0260          |
| Anti-rabbit (secondary antibody)    | Cell Signaling                     | 7074S          |
